# Supplementary material
Source: PubMed Central journal article supplement (PMC2825475)

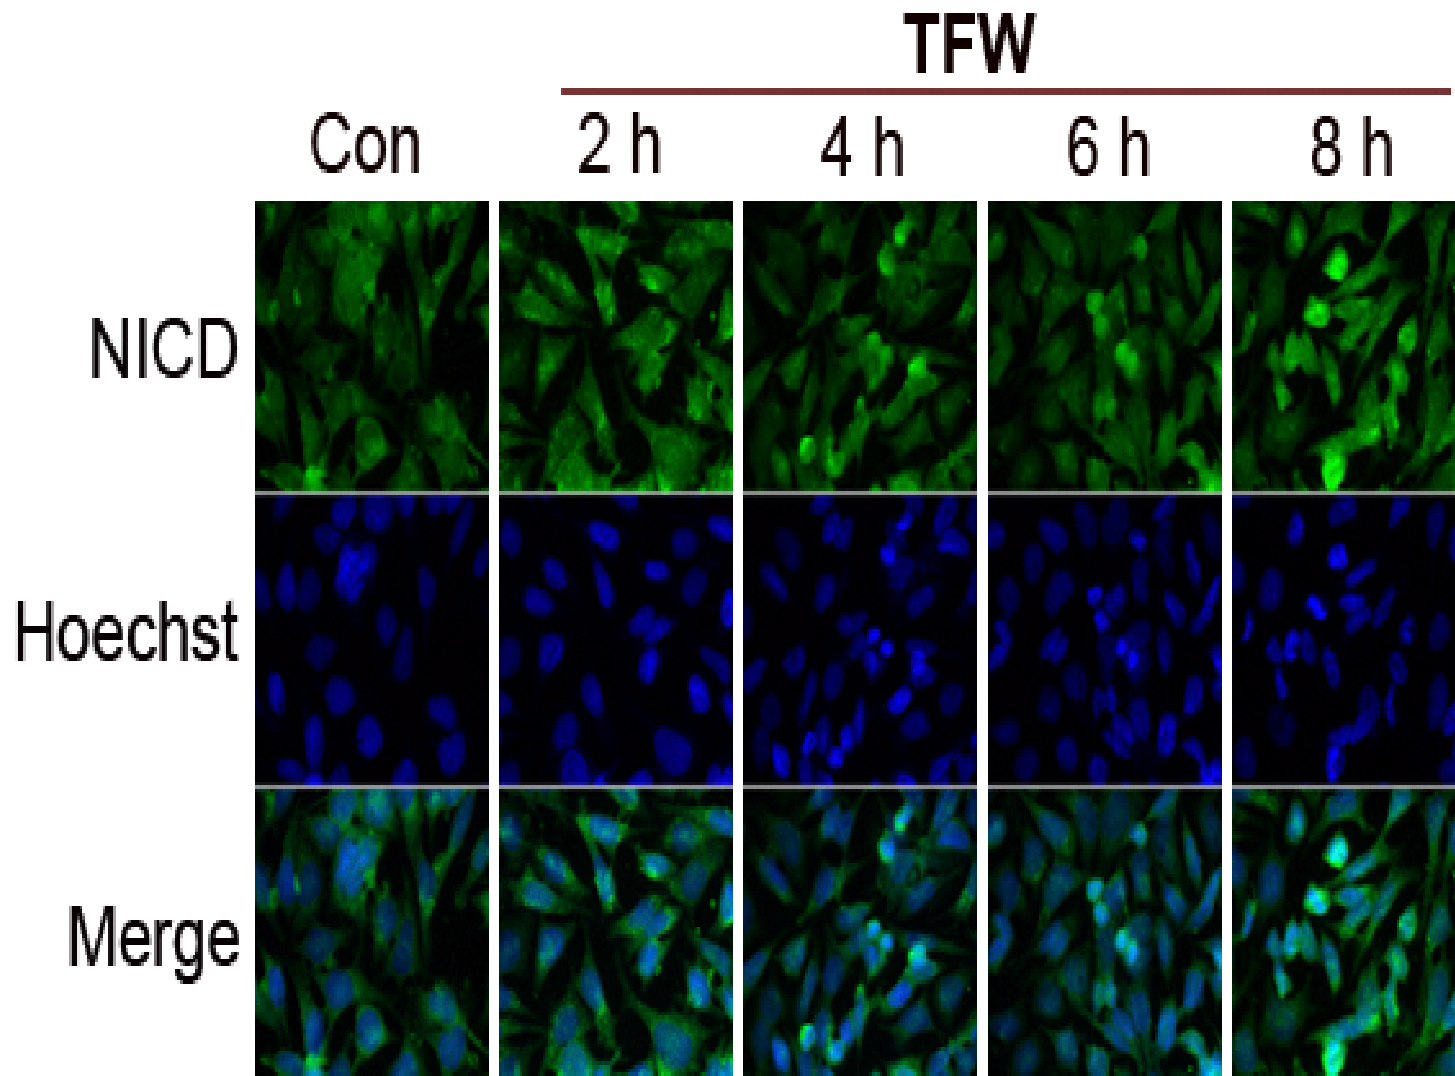

**Supplementary Figure 1**

Supplement: supp_M109.074690_jbc.M109.074690-1.pdf [file supp_M109.074690_jbc.M109.074690-1.pdf]

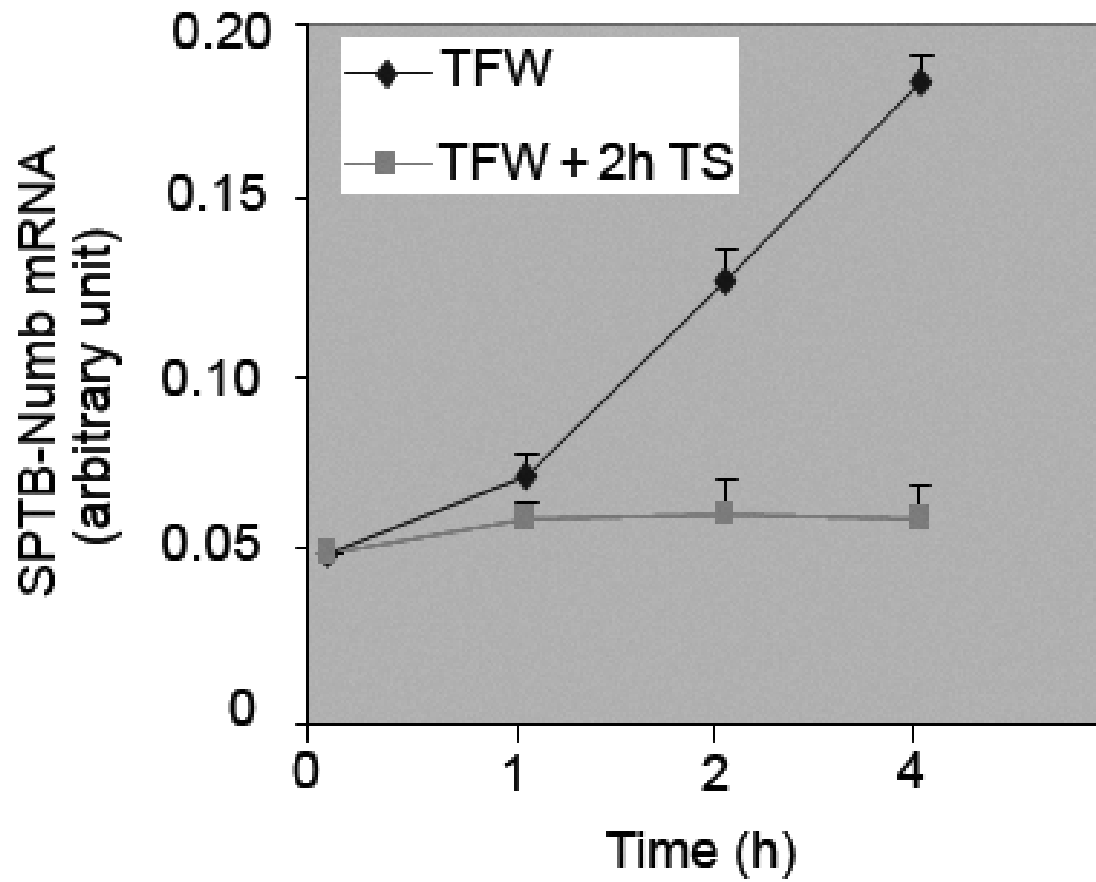

**Supplementary Figure 2**

Supplement: supp_M109.074690_jbc.M109.074690-2.pdf [file supp_M109.074690_jbc.M109.074690-2.pdf]

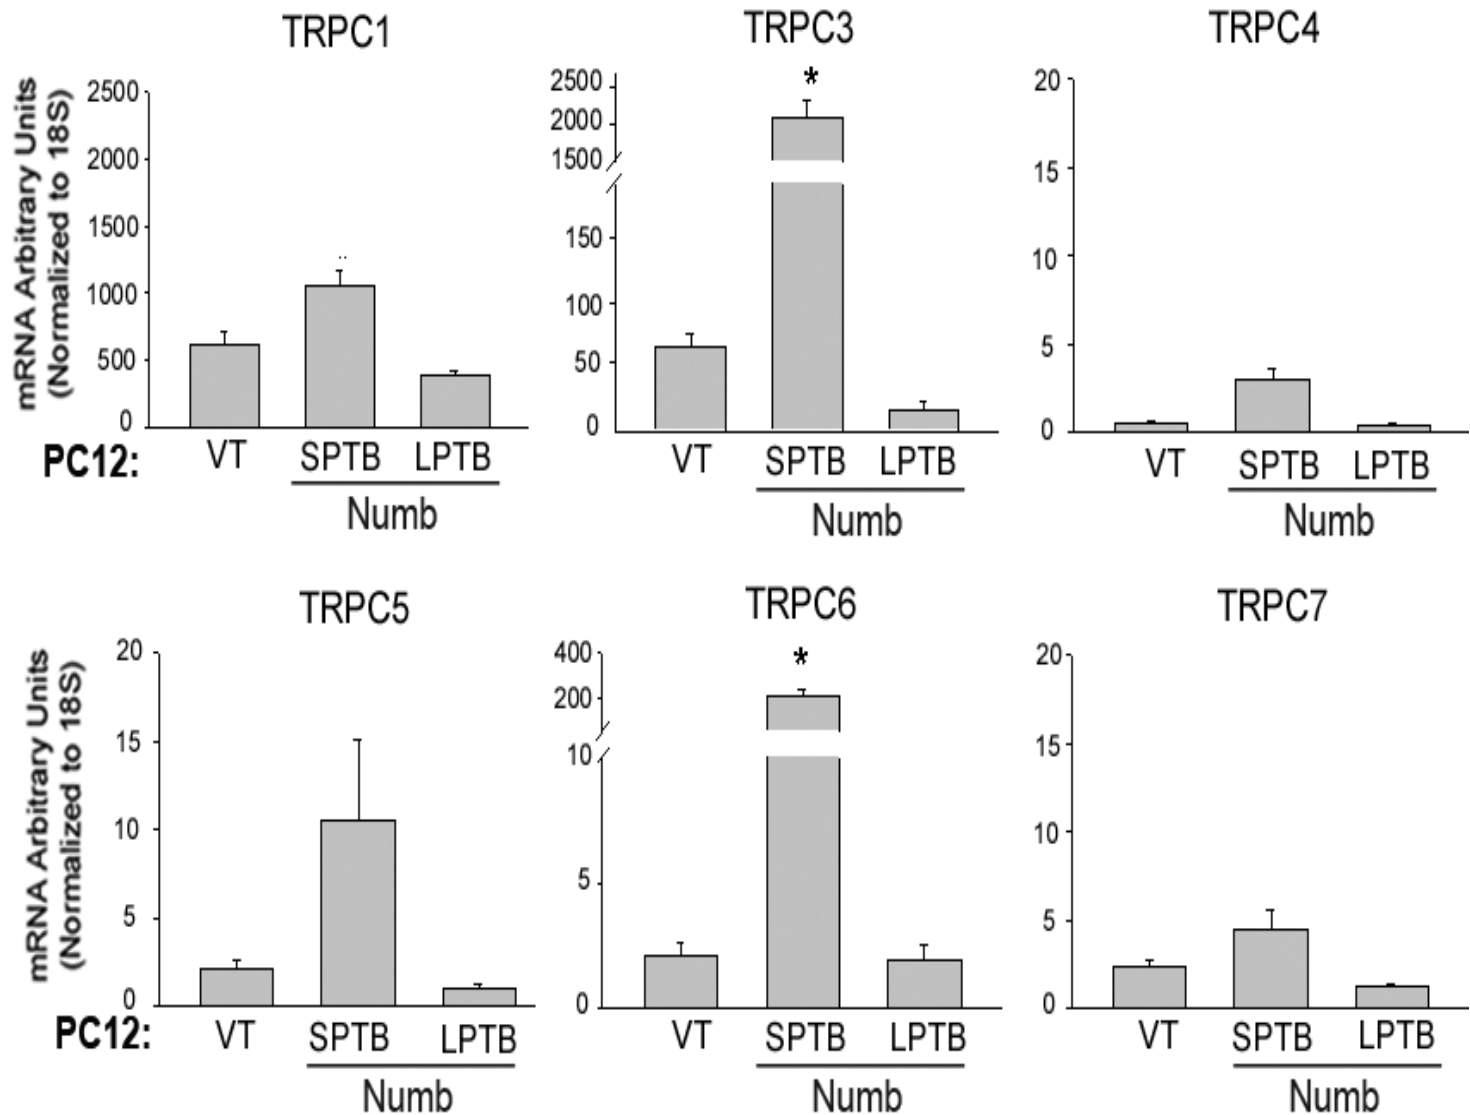

**Supplementary Figure 3**

Supplement: supp_M109.074690_jbc.M109.074690-3.pdf [file supp_M109.074690_jbc.M109.074690-3.pdf]

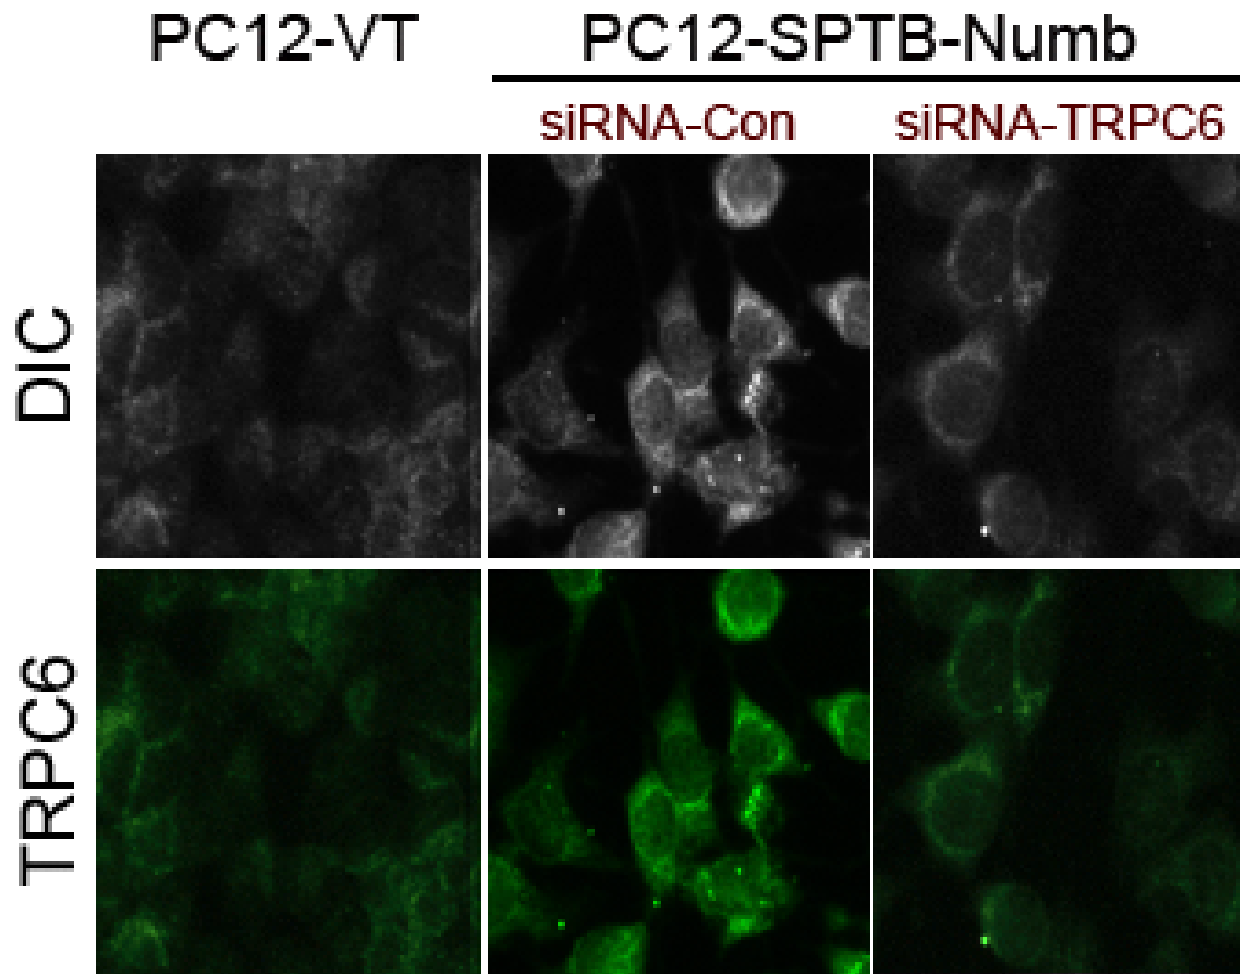

**Supplementary Figure 4**

Supplement: supp_M109.074690_jbc.M109.074690-4.pdf [file supp_M109.074690_jbc.M109.074690-4.pdf]

**(a)**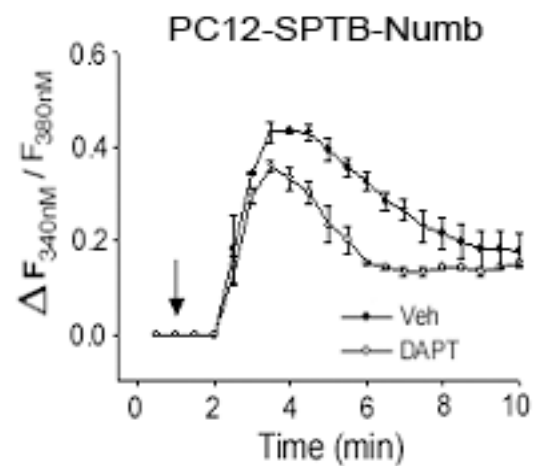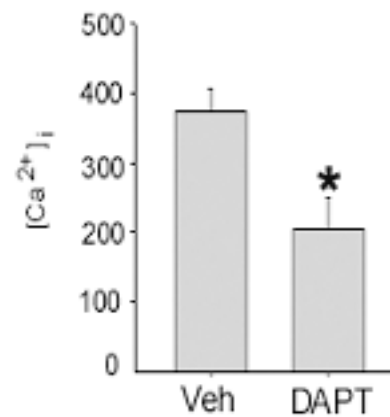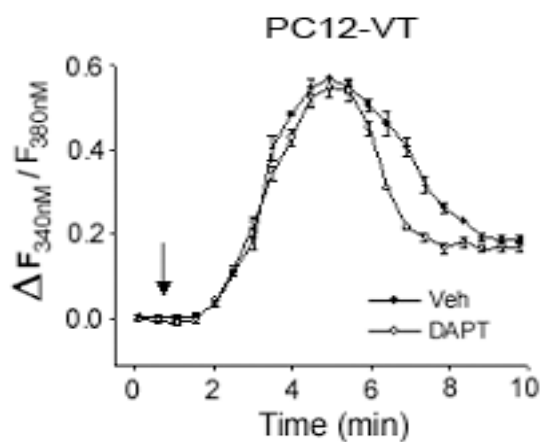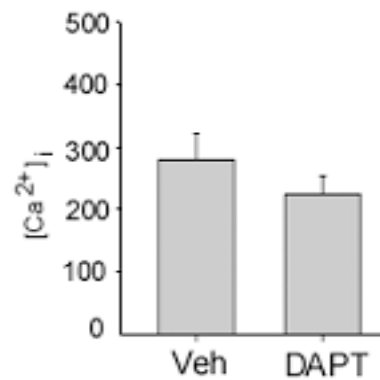**(b)**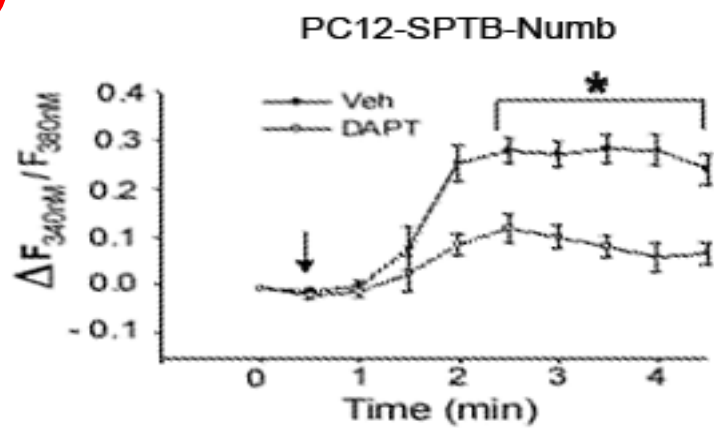**Supplementary Figure 5**

Supplement: supp_M109.074690_jbc.M109.074690-5.pdf [file supp_M109.074690_jbc.M109.074690-5.pdf]

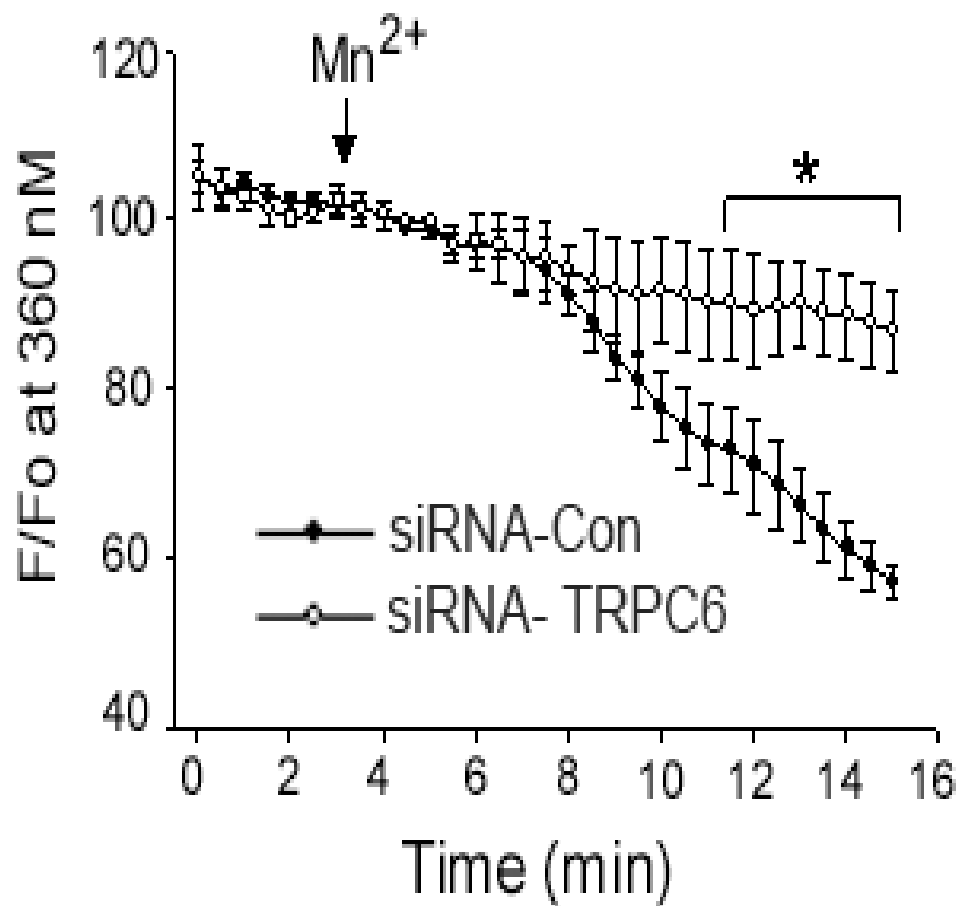

**Supplementary Figure 6**

Supplement: supp_M109.074690_jbc.M109.074690-6.pdf [file supp_M109.074690_jbc.M109.074690-6.pdf]

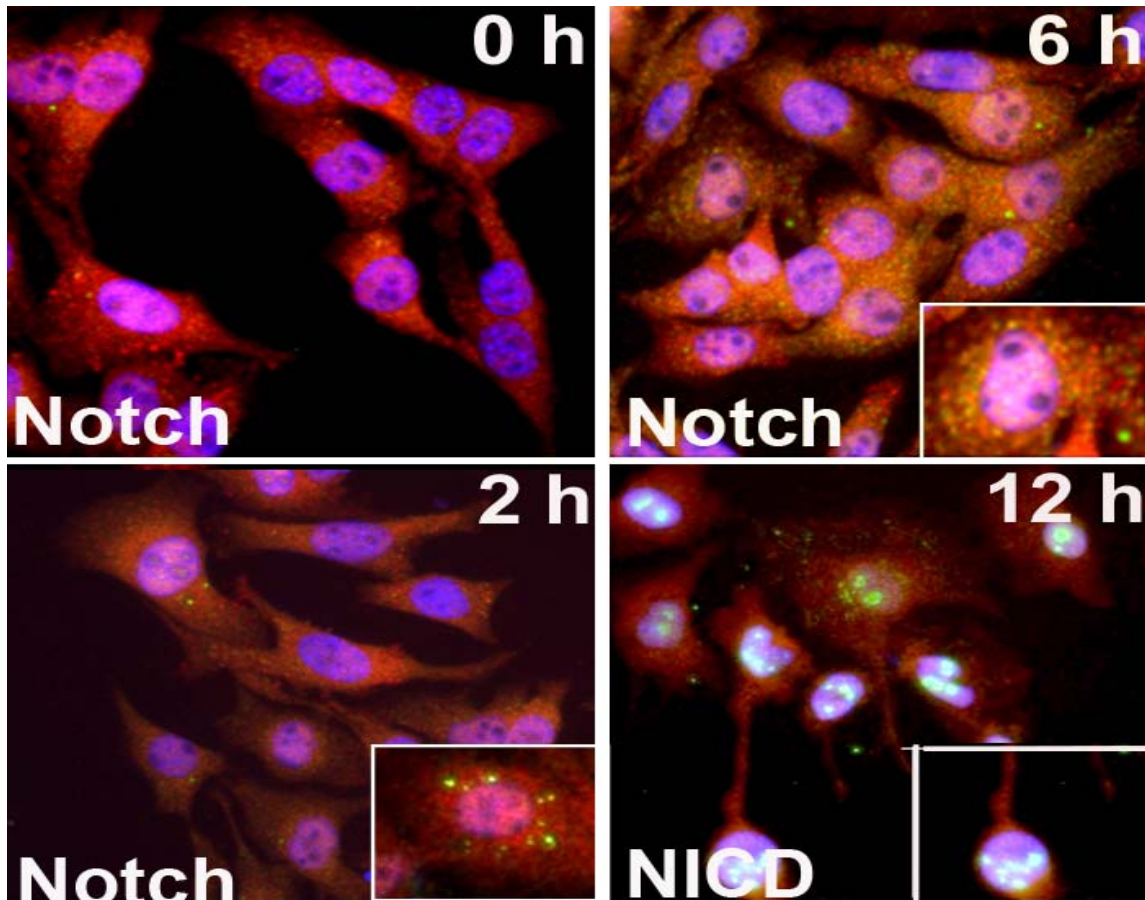

**Supplementary Figure 7**

Supplement: supp_M109.074690_jbc.M109.074690-7.pdf [file supp_M109.074690_jbc.M109.074690-7.pdf]

**(a)**

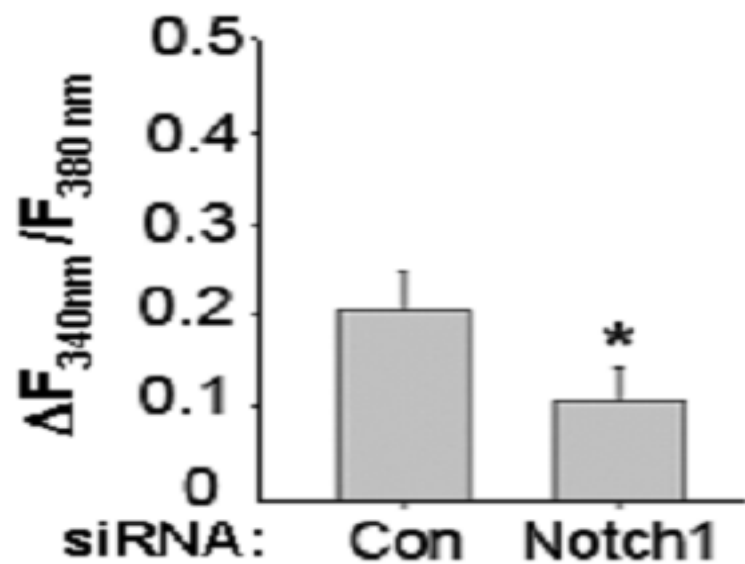

**(b)**

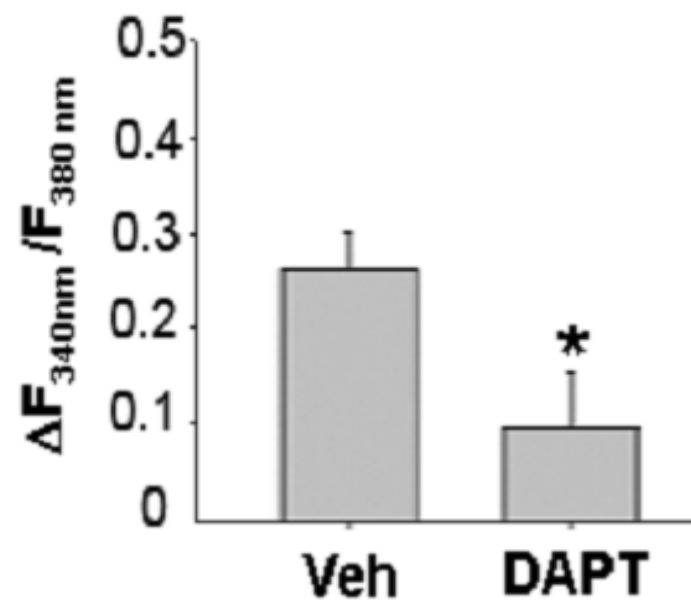

**Supplementary Figure 8**

Supplement: supp_M109.074690_jbc.M109.074690-8.pdf [file supp_M109.074690_jbc.M109.074690-8.pdf]
